# Supplementary material for: Household Water Quantity and Health: A Systematic Review
Source: PubMed Central journal article supplement (PMC4483681; doi:10.3390/ijerph120605954), 2015-05-28
Supplement: ijerph-12-05954-s001.pdf [file ijerph-12-05954-s001.pdf]

## Household Water Quantity and Health: A Systematic Review

**Table S1.** Detailed search strategy.

| <b>Concept 1: Interventions</b>         |                                                                                   |
|-----------------------------------------|-----------------------------------------------------------------------------------|
| Subject headings                        | 1. “drinking water”/exp                                                           |
|                                         | 2. “water supply”/exp                                                             |
|                                         | 3. “well water” /exp                                                              |
|                                         | 4. 1 or 2 or 3 (all MeSH terms)                                                   |
| Specific interventions                  | 5. water adj2 (connect* or access* or require* or consum* or suppl* or distance*) |
|                                         | 6. (rainwater or "rain water") adj3 (collect* or harvest*)                        |
|                                         | 7. (standpipe* or handpump* or borehole*)                                         |
|                                         | 8. 5 or 6 or 7                                                                    |
| All interventions of interest           | 9. 4 or 8                                                                         |
| Measures of water quantity              | 10. gallon* or quart* or pint* or cup* or ounce* or *liter*/ or *litre*/          |
|                                         | 11. water adj3 (quantit* or amount* or volume* or much or usage)                  |
|                                         | 12. 10 or 11                                                                      |
| Interventions related to water quantity | 13. 9 and 12                                                                      |

Table S1. Cont.

| <b>Concept 2: Outcomes</b>                 |                                                                                                                                                                                   |
|--------------------------------------------|-----------------------------------------------------------------------------------------------------------------------------------------------------------------------------------|
| All health outcomes                        | 14. diarrhea / exp                                                                                                                                                                |
|                                            | 15. morbidity or mortality or death*                                                                                                                                              |
|                                            | 16. diarrhea* or diarrhoea*                                                                                                                                                       |
|                                            | 17. (water-borne or waterborne or water-wash*) adj3 disease*                                                                                                                      |
|                                            | 18. Cholera* or typhoid* or shigella* or dysentar* or cryptosporid* or giardia* or escherichia* or clostridium or rotavirus* or coli or norovirus* or campylobacter* or hepatitis |
|                                            | 19. "respiratory disease*"                                                                                                                                                        |
|                                            | 20. Dermatitis or folliculitis or lice or lymphatic filariasis or ringworm or tinea or scabies or trachom* or conjunctivitis or pinkeye or yaws or lepros* or typhus              |
| 21. Injur* or Burn*                        |                                                                                                                                                                                   |
| All health outcomes<br>(continued)         | 22. malnutrition or malnourish* or undernutrition or undernourish* or nutrition* status                                                                                           |
|                                            | 23. anemi* or anaemi* or (vitamin adj3 deficienc*)                                                                                                                                |
|                                            | 24. stunt* or wast* or emaciat* or underweight                                                                                                                                    |
|                                            | 25. BMI or body mass index                                                                                                                                                        |
|                                            | 26. Or/14-25                                                                                                                                                                      |
| <b>Combined interventions and outcomes</b> | 27. 13 and 26                                                                                                                                                                     |

© 2015 by the authors; licensee MDPI, Basel, Switzerland. This article is an open access article distributed under the terms and conditions of the Creative Commons Attribution license (<http://creativecommons.org/licenses/by/4.0/>).
